# Supplementary material for: Minimisation of E-Factor in the synthesis of N-hydroxylamines: the role of silver(i)-based coordination polymers
Source: Royal Society of Chemistry journal article supplement (doi:10.1039/c2gc35076a), 2012-01-01
Supplement: c2gc35076a.pdf [file c2gc35076a.pdf]

# Supporting Information for

## Minimisation of E-Factor in the Synthesis of *N*-Hydroxylamines: The Role of Silver (I)-based Coordination Polymers in Green Chemistry

Mehdi Sheykhan, Zohreh Rashidi Ranjbar, Ali Morsali, Akbar Heydari\*

Chemistry Department, Tarbiat Modares University, P. O. Box 14155-4838 Tehran, Iran

E-mail: akbar.heydari@gmx.de

### Table of contents:

|                                                                                                                                                                                                                                     | Page    |
|-------------------------------------------------------------------------------------------------------------------------------------------------------------------------------------------------------------------------------------|---------|
| 1. E-Factor calculation and comparison with literature                                                                                                                                                                              | S2-S4   |
| 2. XRD patterns of $[\text{Ag}(\mu\text{-bpfb})(\text{NO}_3)]_n$ and $[\text{Ag}(\mu\text{-bpfb})(\text{X})]_n$ ( $\text{X}^- = \text{NO}_3^-$ , $\text{SCN}^-$ , $\text{N}_3^-$ and $\text{ClO}_4^-$ ) <b>4a-d</b> nano-structures | S5      |
| 3. SEM images                                                                                                                                                                                                                       | S6-S9   |
| 4. X-ray crystallographic results                                                                                                                                                                                                   | S10-S12 |
| 5. $^1\text{H}$ and $^{13}\text{C}$ -NMR of $[\text{Ag}(\mu\text{-bpfb})(\text{NO}_3)]_n$ ( <b>4a</b> )                                                                                                                             | S13     |
| 6. $^1\text{H}$ NMR of <i>N</i> -monoalkylated hydroxylamines derivatives                                                                                                                                                           | S14-S19 |

E-Factor, <sup>S1-S6</sup> defined as the mass ratio of waste to desired product. Therefore, as the E-Factor increases the amount of waste increases and, lead to greater negative environmental impact. The ideal E-Factor is 0. Put quite simply, it is kilograms (of raw materials) in, minus kilograms of desired product, divided by kilograms.<sup>7</sup>

Following the important role of environmental acceptability in organic synthesis, our work based on invention of a method to minimize the E-Factor. Calculation of this factor and comparison with literature review show this is achieved.

**For entry e:**

$$E = \frac{0.208 \text{ g (UHP)} + 1 \text{ mL} \left(0.71 \frac{\text{g}}{\text{mL}}\right) (\text{ether}) + 0.358 \text{ g (entry e)} - 0.81 * 0.390 \text{ g}}{0.81 * 0.390 \text{ g}} = 3.04$$

**Same calculation for other entries lead to E-Factors = 2.36-4.29  
(entries a:4.29, b:4.21, c:4.00, d:3.15, e:3.04, f:2.36)**

- **Ref 5** (*J. Org. Chem.*, 1990, **55**, 1981-1983)

$$E = \frac{41 \text{ g (amine)} + (2 + 1.2) \left(0.79 \frac{\text{g}}{\text{mL}}\right) (\text{acetone}) + 0.074 \text{ g (dioxirane)} - 0.76(0.335 \text{ g})}{0.76 * 0.335 \text{ g}} = 170.2$$

**S1-R.** A. Sheldon, *Chem. Ind. (London)*, **1992**, 903–906

**S2-R.** A. Sheldon, in *Precision Process Technology*, M.P. C. Weijnen, A. A.H. Drinkenburg (Eds.), Kluwer, Dordrecht, 1993, pp. 125–138.

**S3-R.** A. Sheldon, in *Industrial Environmental Chemistry*, D.T. Sawyer, A. E. Martell (Eds.), Plenum, New York, 1992, pp. 99–119.

**S4-R.** A. Sheldon, *J. Chem. Technol. Biotechnol.*, 1997, **68**, 381–388.

**S5-R.** A. Sheldon, *J. Mol. Catal. A: Chemical*, 1996, **107**, 75–83.

**S6-R.** A. Sheldon, *Pure Appl. Chem.*, 2000, **72**, 1233–1246.

**S7-R.** A. Sheldon, I. Arends and U. Hanefeld, *Green Chemistry and Catalysis*, 2007, p. 2.

- **Ref 6** (*J. Org. Chem.*, 1999, **64**, 7451-7458)

For step 1:

$$\frac{2.6 \text{ g (amine)} + 40\text{mL} \left(0.86 \frac{\text{g}}{\text{mL}}\right) (\text{toluene}) + 2.12 \text{ g (benzaldehyde)} - 4 \text{ g (imine)}}{4 \text{ g}} = 8.78$$

For step 2:

$$\frac{4 \text{ g (imine)} + (20 + 50) \text{ mL} \left(1.33 \frac{\text{g}}{\text{mL}}\right) (\text{CH}_2\text{Cl}_2) + 4.1 \text{ g (mCPBA)} - 3.5 \text{ g (oxaziridine)}}{3.5 \text{ g}} = 27.88$$

For step 3:

$$\frac{0.47 \text{ g (oxaziridine)} + (30)\text{mL} \left(1.33 \frac{\text{g}}{\text{mL}}\right) (\text{CH}_2\text{Cl}_2) + 8 \text{ mL} \left(1.49 \frac{\text{g}}{\text{mL}}\right) (\text{TFA}) - 0.3 \text{ g}}{0.3 \text{ g}} = 173$$

**Therefore net E-Factor = 173+27.88+8.78 = 209.66**

- **Ref 7** (*J. Org. Chem.*, 2000, 65, 5937-5941)

E

$$\begin{aligned} &= \frac{0.388 \text{ g (amine)} + 15 \text{ mL} \left(0.87 \frac{\text{g}}{\text{mL}}\right) (\text{benzene}) + 1.39 \text{ g (oxone)} + 150 \text{ mL} \left(0.79 \frac{\text{g}}{\text{mL}}\right) (\text{MeOH}) - 0.331 \text{ g}}{0.331 \text{ g}} \\ &= \mathbf{401.83} \end{aligned}$$

- **Ref 9** (*Chem. Commun.*, 2000, 5, 409-410)

$$\frac{0.0068 \text{ g (BINAP)} + 2.5 \text{ mL} \left(0.89 \frac{\text{g}}{\text{mL}}\right) (\text{THF}) + 0.0026 \text{ g (NBu}_4\text{BH}_4) + 0.092 \text{ (N. oxide)} - 0.076 \text{ g}}{0.076 \text{ g}} = 29.6$$

**E-Factor = 29.6** (only in hydrogenation step, 2 to 3, without regarding transformation to nitron)

- **Ref 10** (*J. Org. Chem.* 1994, **59**, 4858-4861)

$$\frac{0.183 \text{ g (imine)} + 20 \text{ mL} \left(0.79 \frac{\text{g}}{\text{mL}}\right) (\text{acetone}) + 0.074 \text{ g (dioxirane)} - 0.107 \text{ g}}{0.107 \text{ g}} = 149$$

**E-Factor = 149** (until sythesis of nitron 11 and without regarding its aqueous hydrolysis step by HCl to N-hydroxylamine 12)

**1. XRD patterns of  $[\text{Ag}(\mu\text{-bpfb})(\text{NO}_3)]_n$  (top) and  $[\text{Ag}(\mu\text{-bpfb})(\text{X})]_n$  ( $\text{X} = \text{NO}_3^-$ ,  $\text{SCN}^-$ ,  $\text{N}_3^-$  and  $\text{ClO}_4^-$ ) 4a-d nano-structures (down)**

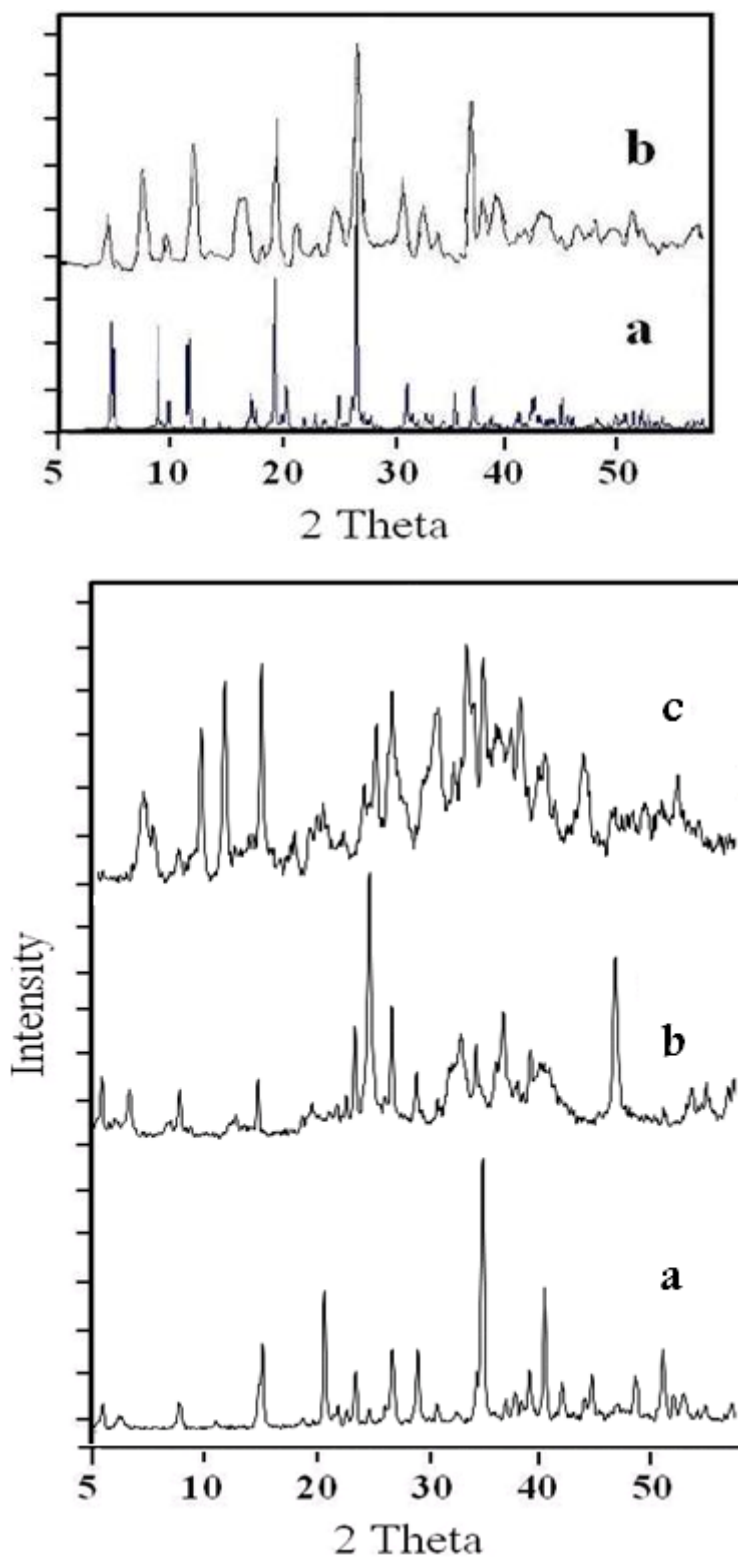

## 2. SEM images

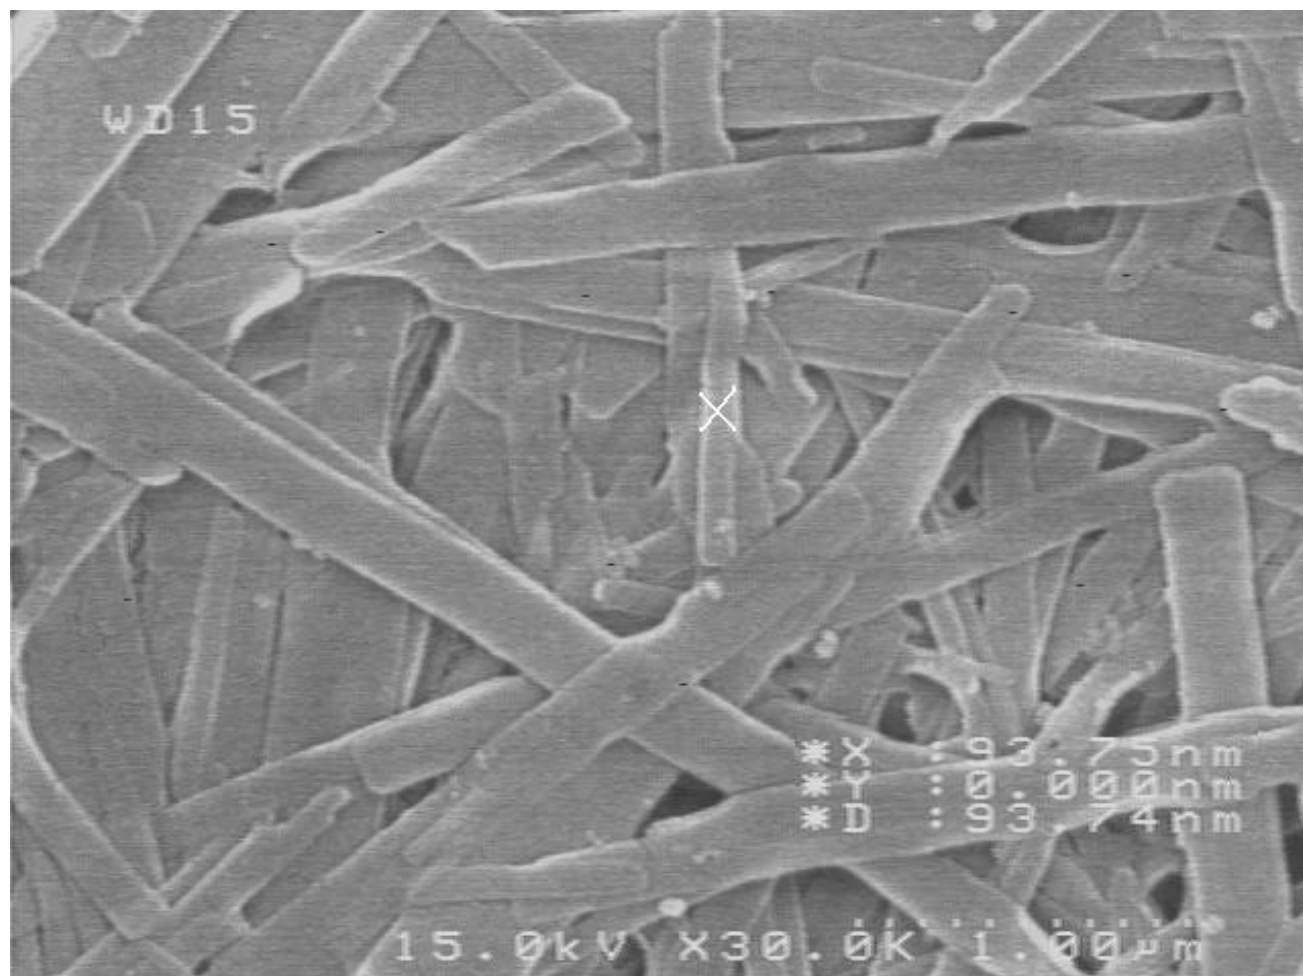

$[\text{Ag}(\mu\text{-bpfb})(\text{NO}_3)]_n$  (**4a**)

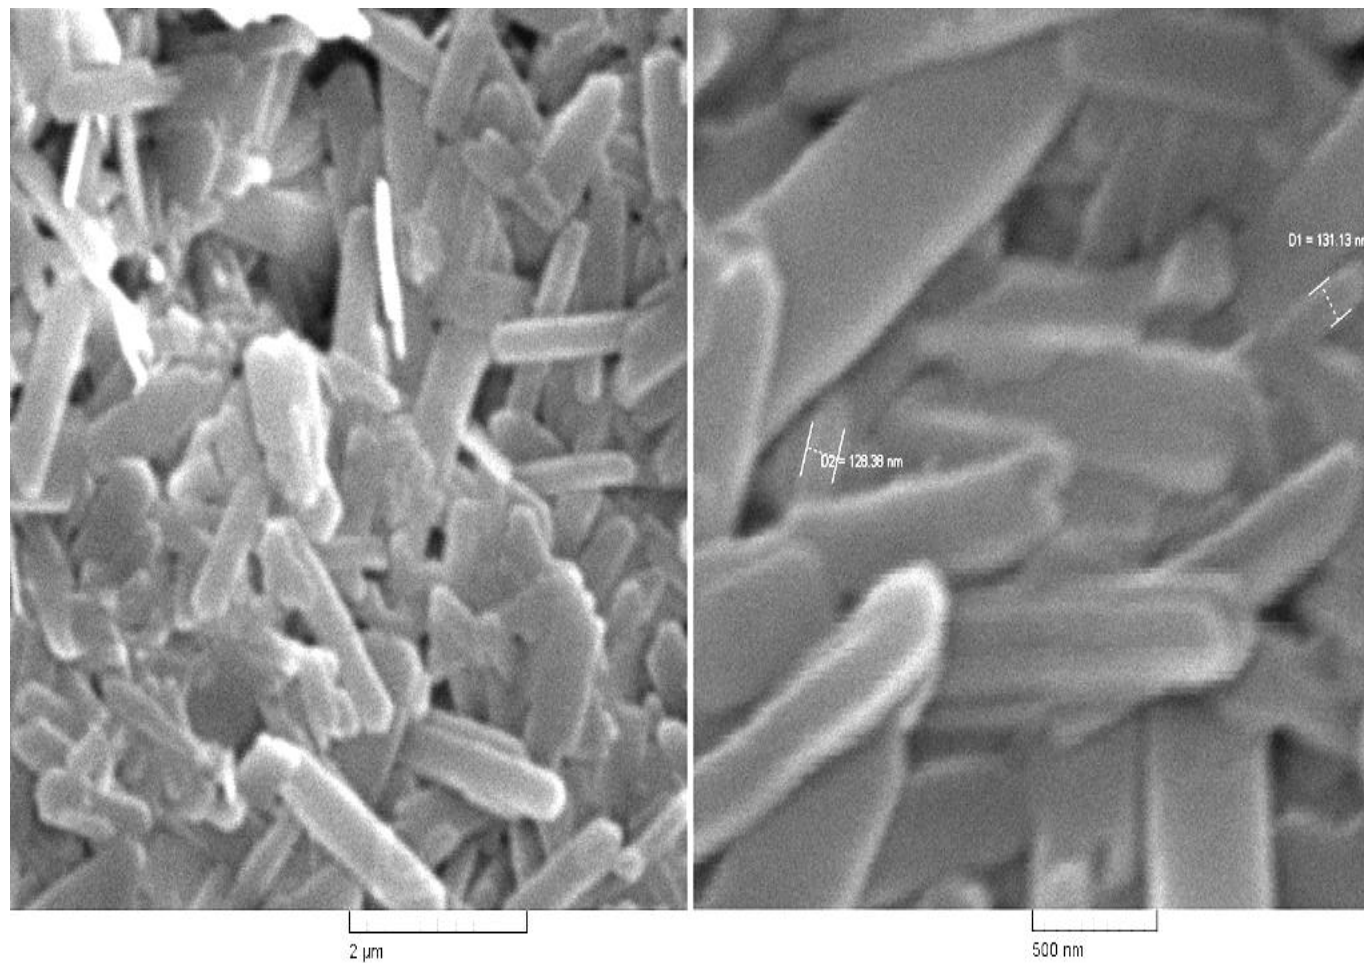

$[\text{Ag}(\mu\text{-bpfb})(\text{SCN})]_n$  (**4b**)



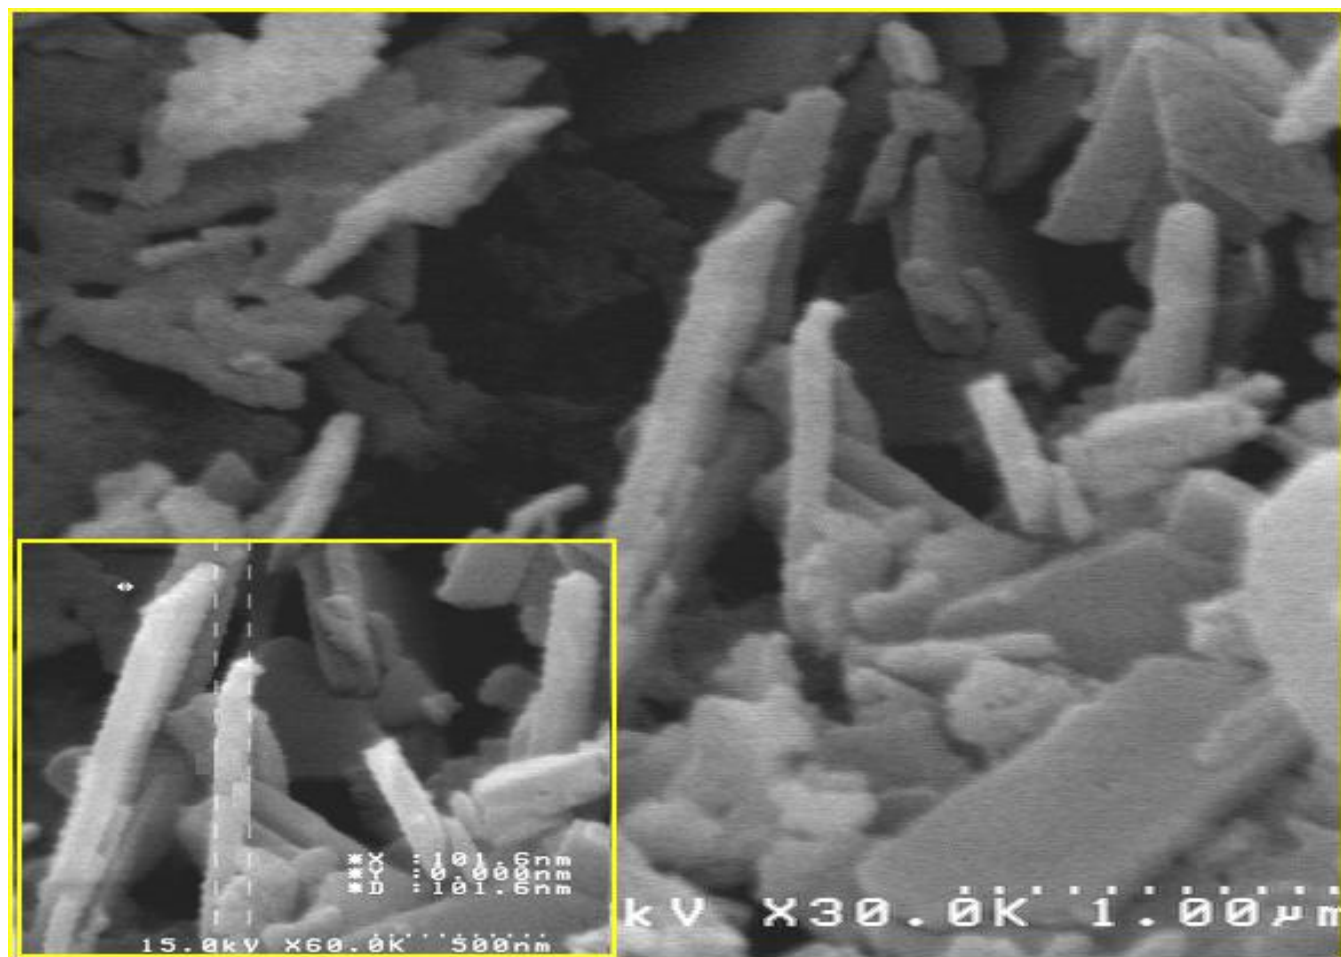

$[\text{Ag}(\mu\text{-bpfb})(\text{N}_3)]_n$  (**4c**)



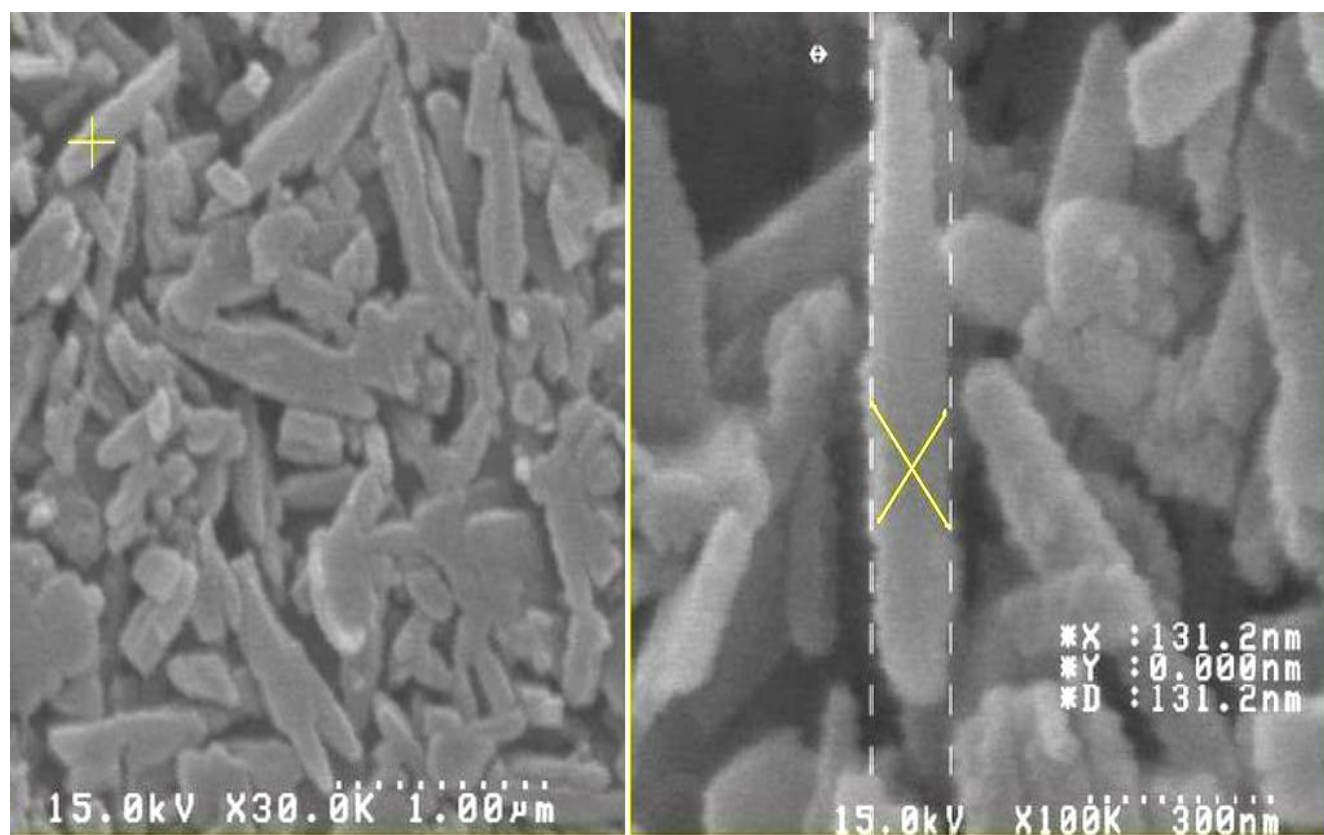

$[\text{Ag}(\mu\text{-bpfb})(\text{ClO}_4)]_n$  (**4d**)

### 3. X-ray crystallographic results

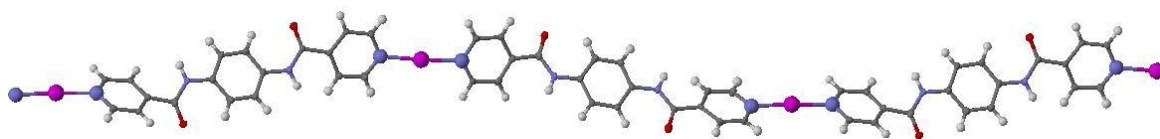

A fragment of the one-dimensional chain in compound **4a** along crystallographic c axis [001]  
(Ag = violet, O = red, C = gray, N = blue).

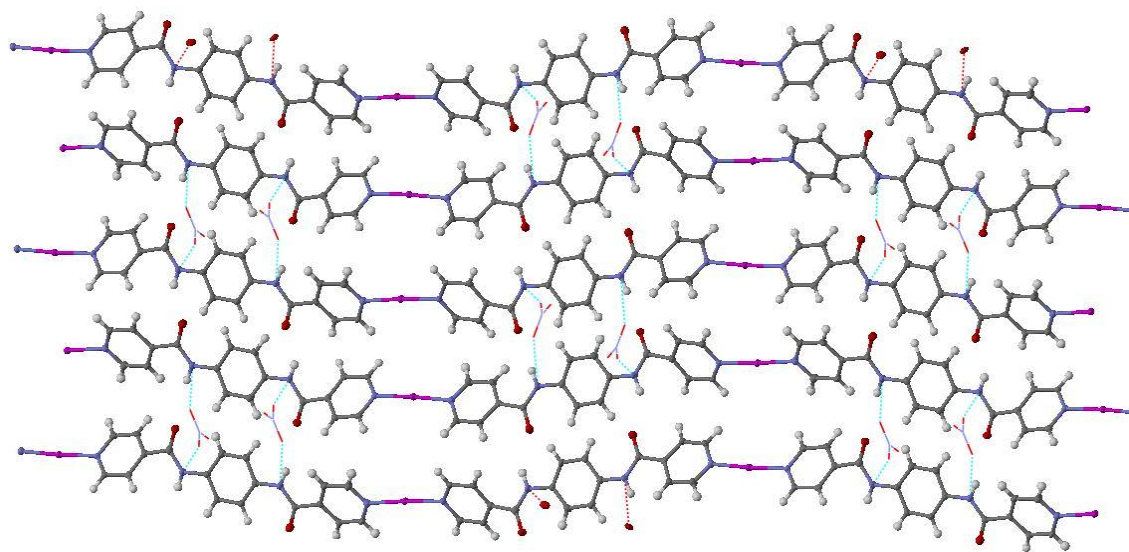

Hydrogen bonds form the 2D coordination polymer (Ag = violet, O = red, C = gray, N = blue).

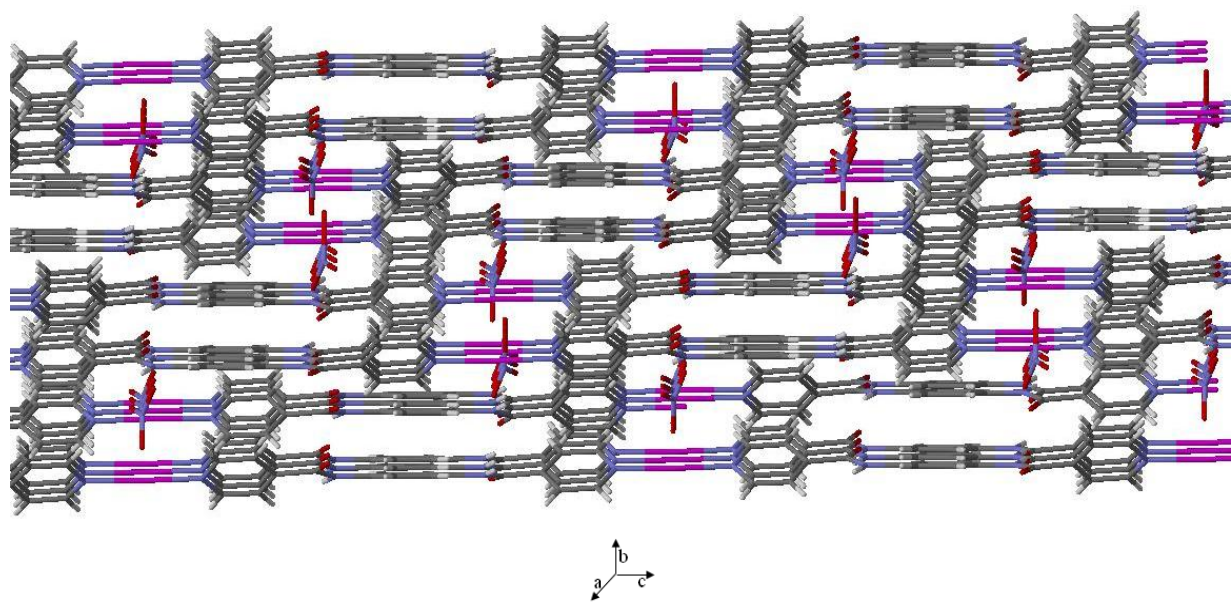

The  $\pi$ - $\pi$  stacking interaction in supermolecule structure (Ag = violet, O = red, C = gray, N = blue).

#### 4. $^1\text{H}$ and $^{13}\text{C}$ -NMR of $[\text{Ag}(\mu\text{-bpfb})(\text{NO}_3)]_n$ (4a)

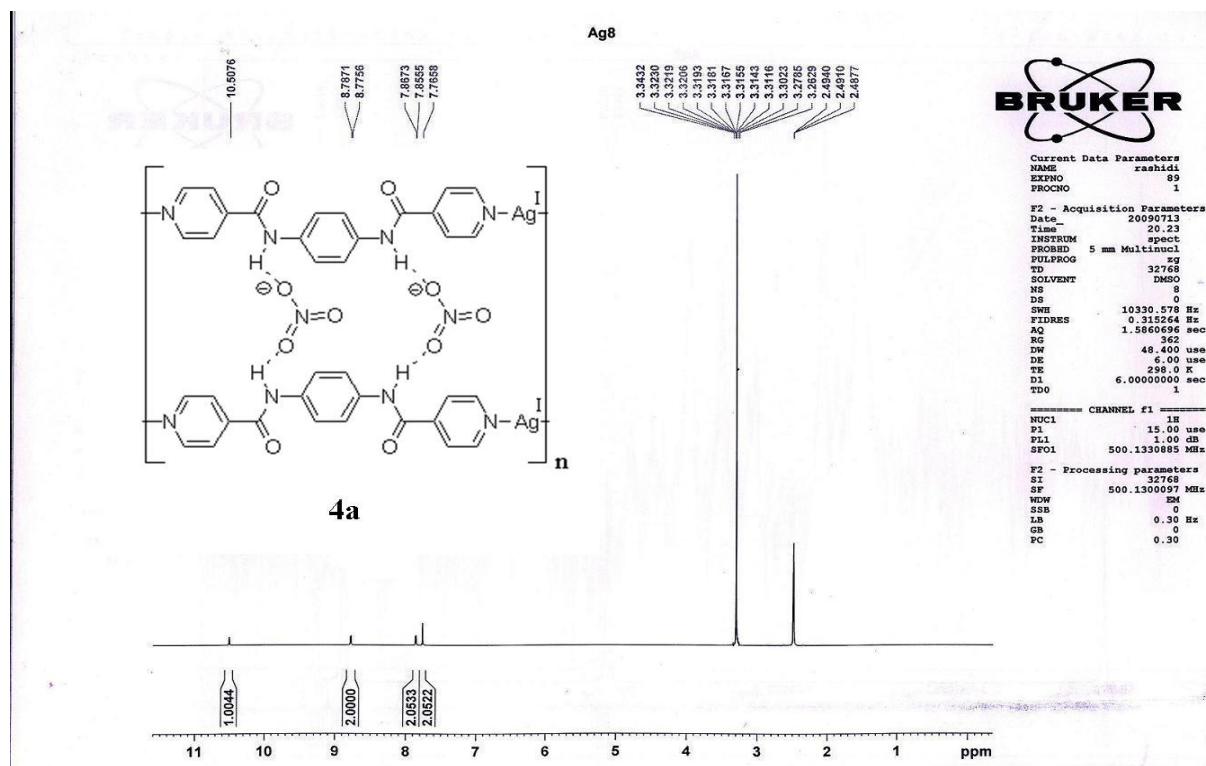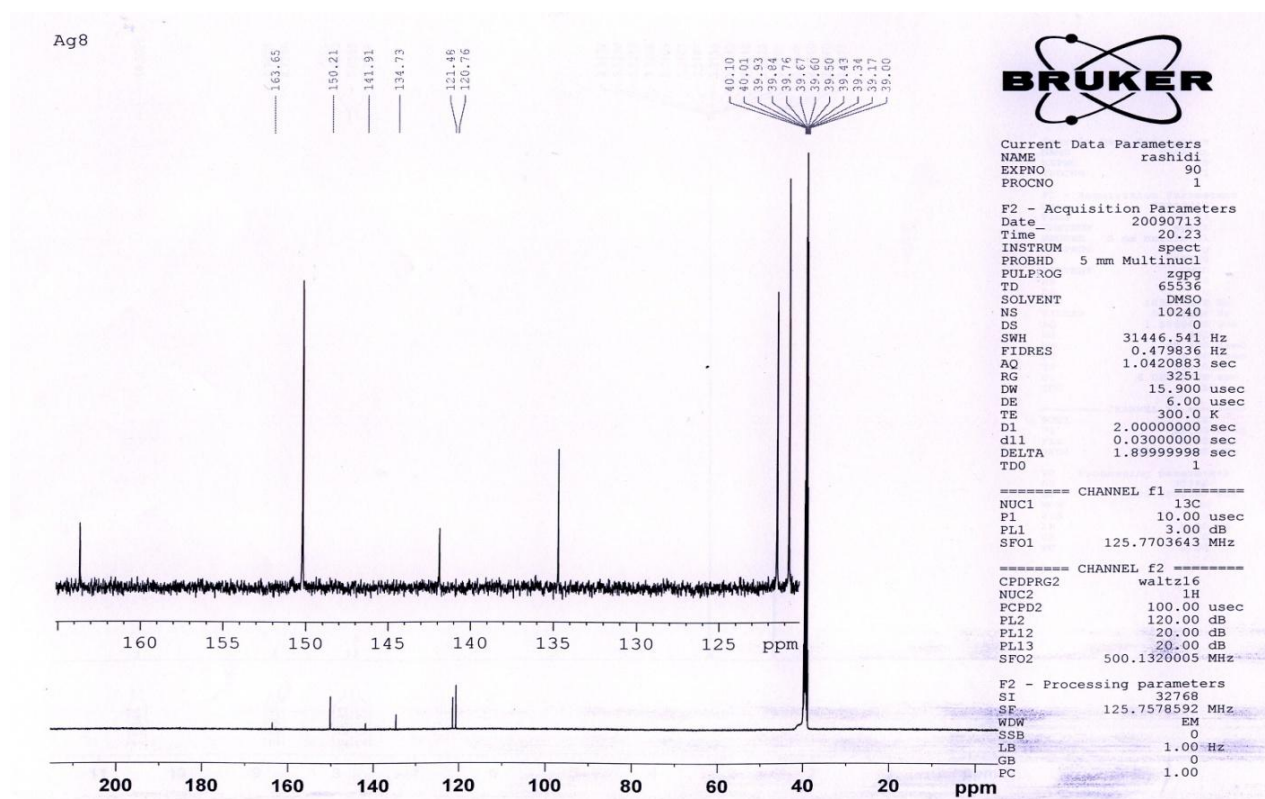

## 5. $^1\text{H}$ NMR of *N*-monoalkylated hydroxylamines derivatives

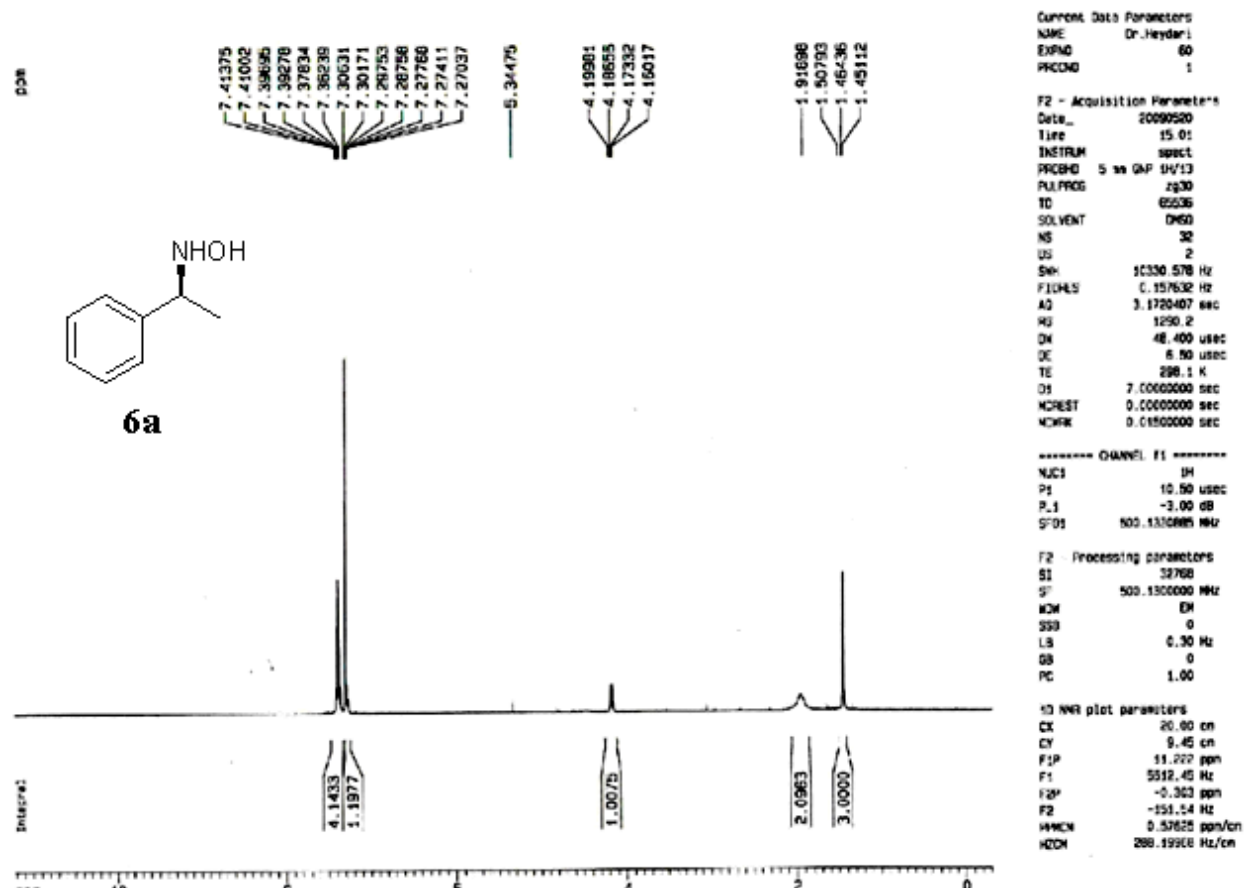

White crystals, mp 69–71 °C [ref 20]



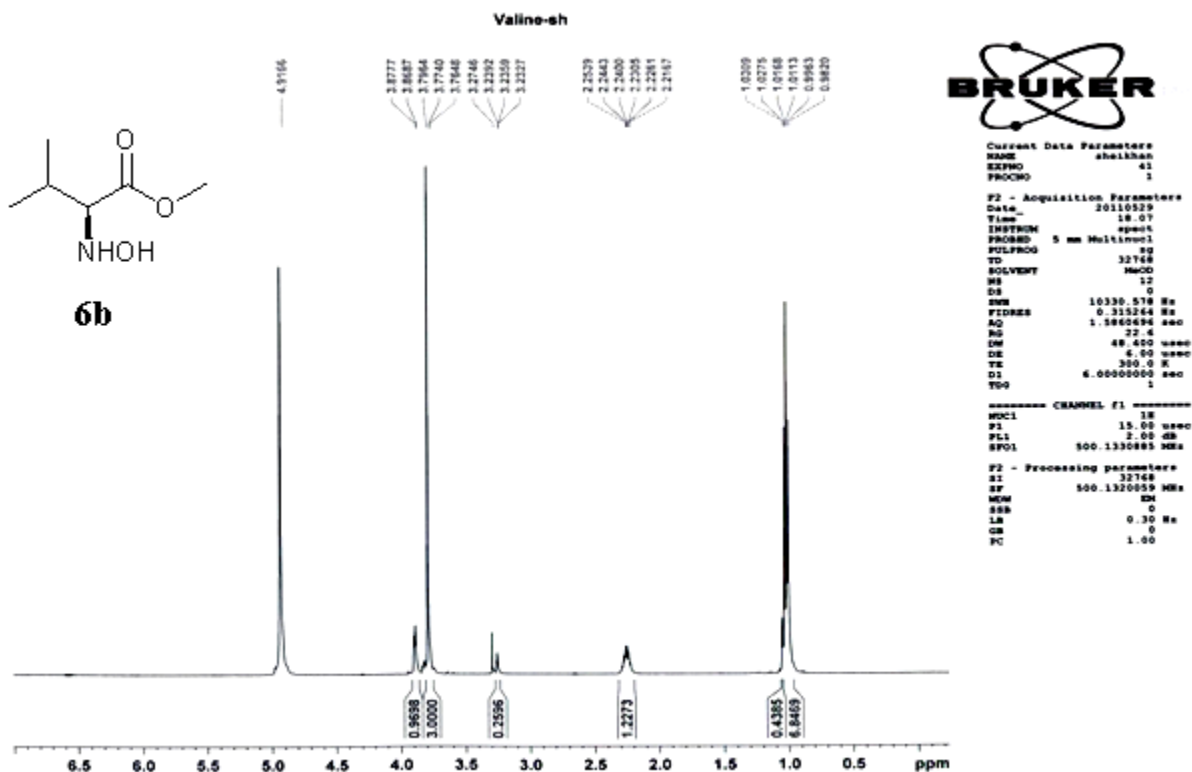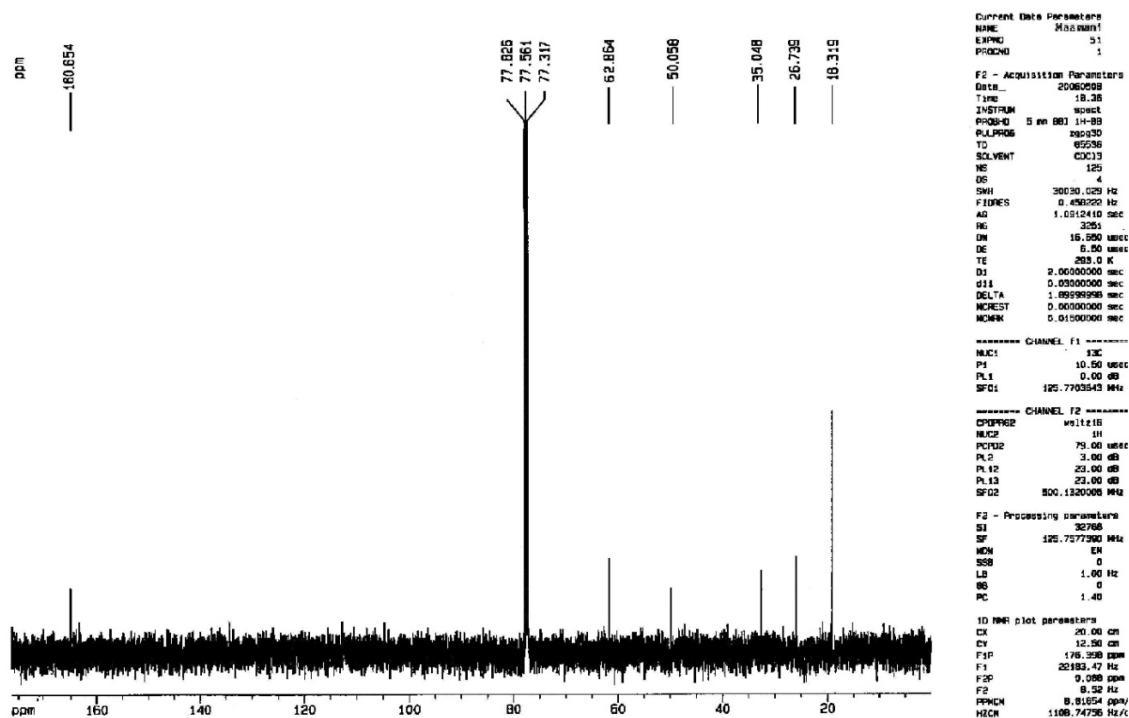

White crystals, mp 158–159 °C [ref 5]



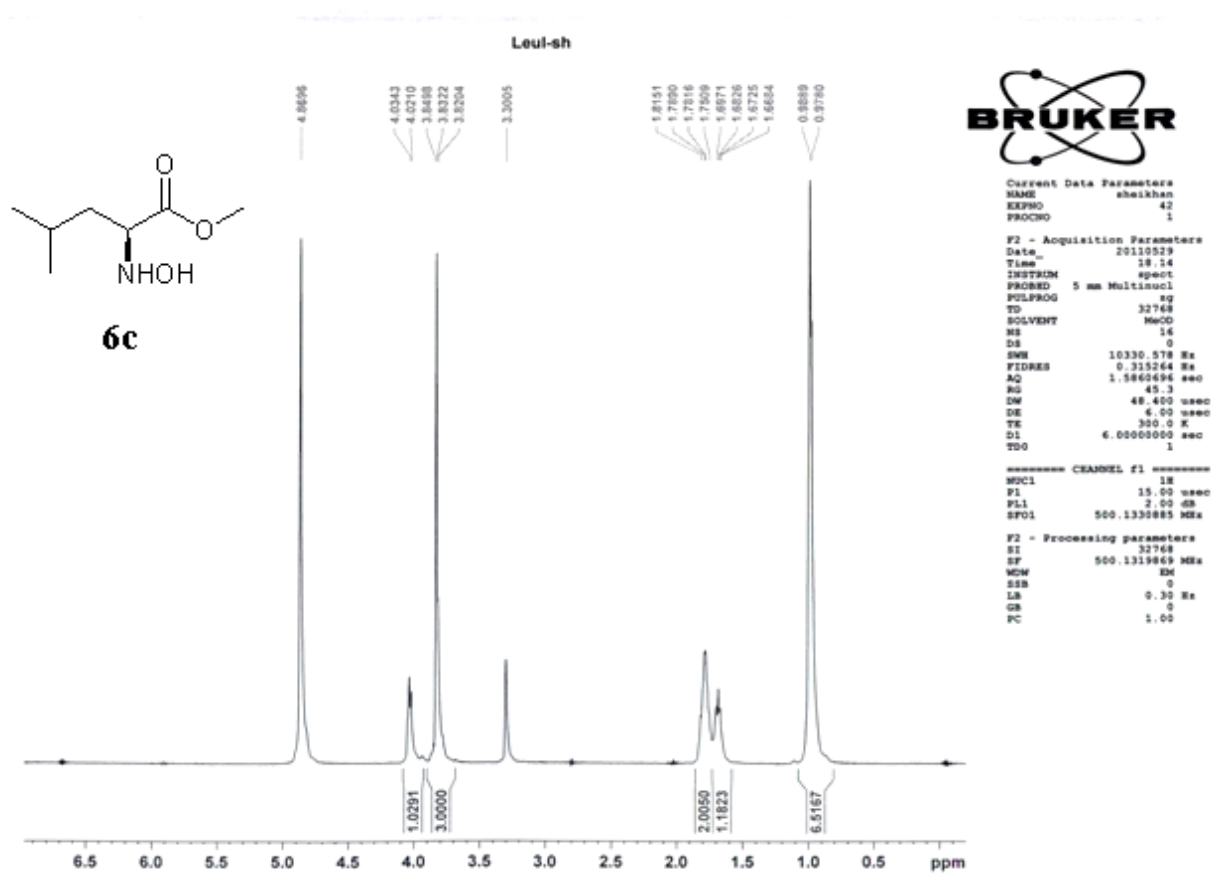

White crystals, mp 65–67 °C [ref 19]

```

F2 - Acquisition Parameters
Date_      20110529
Time_      18.22
INSTRUM    spect
PROBHD     5 mm Multiscale
PULPROG    zg
TD          32768
SOLVENT    MeCO
NS          16
DS          0
SWH         10330.578  Ks
FIDRES      0.313264  Ks
AQ          1.98604994  secO
RG          45.3
CW          48.400  usec
DE          6.00  usec
TE          300.0  K
D1          6.00000000  sec
TD0         1

```

|                            |                 |
|----------------------------|-----------------|
| F2 = Processing parameters |                 |
| SI                         | 32768           |
| SF                         | 500.1300104 MHz |
| WDW                        | KM              |
| SSB                        | 0               |
| LB                         | 0.30 Hz         |
| GB                         | 0               |
| PC                         | 1.00            |

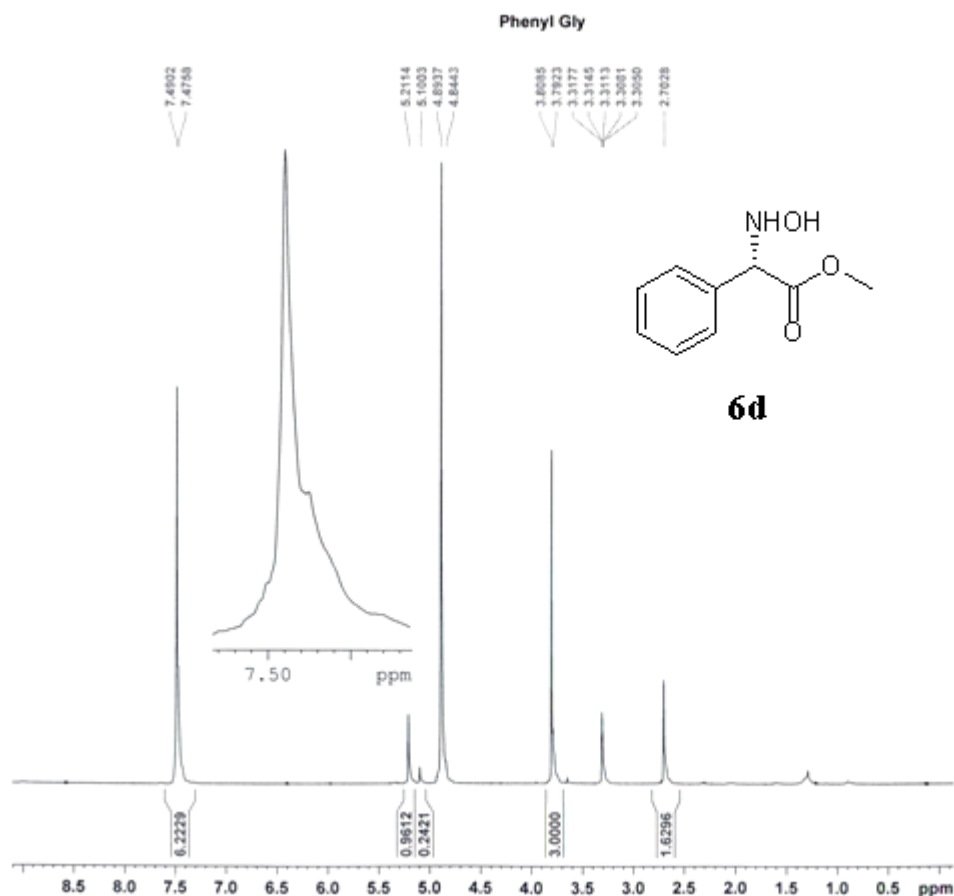

S 17

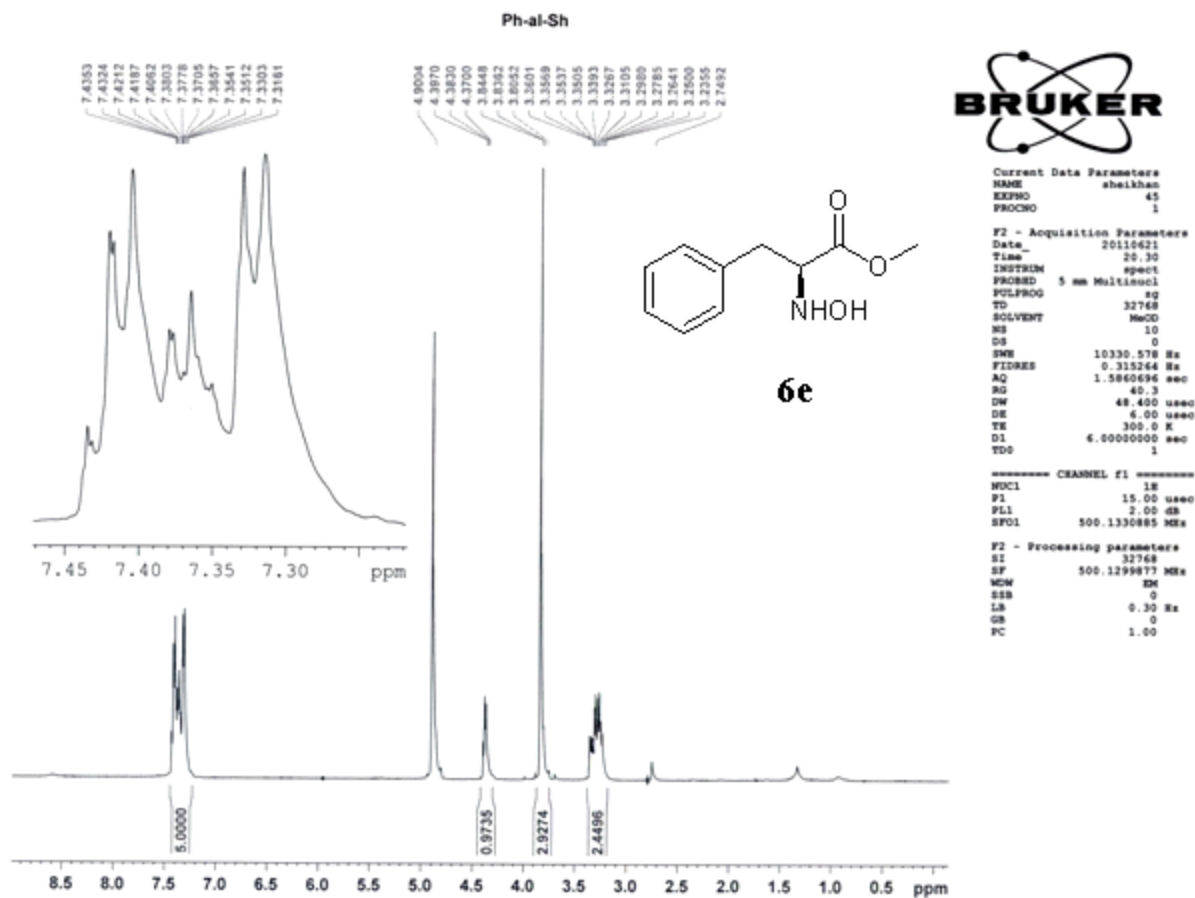

White crystals, mp 69–71 °C [ref 5,6]

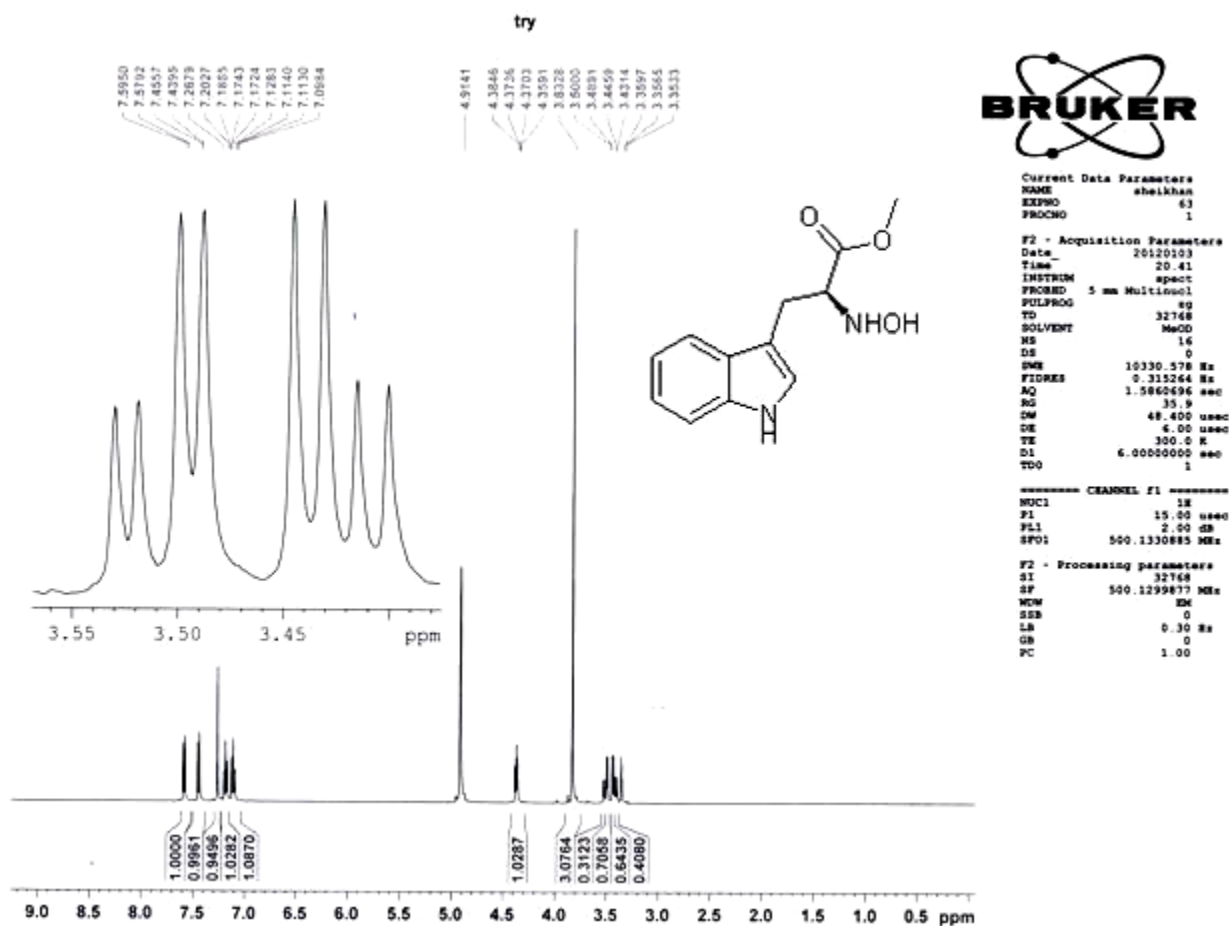

Pale yellow crystals, mp 82 °C [ref 21]
